# Supplementary material for: Gene duplication and paleopolyploidy in soybean and the implications for whole genome sequencing
Source: PubMed Central journal article supplement (PMC2077340; doi:10.1186/1471-2164-8-330), 2007-09-19

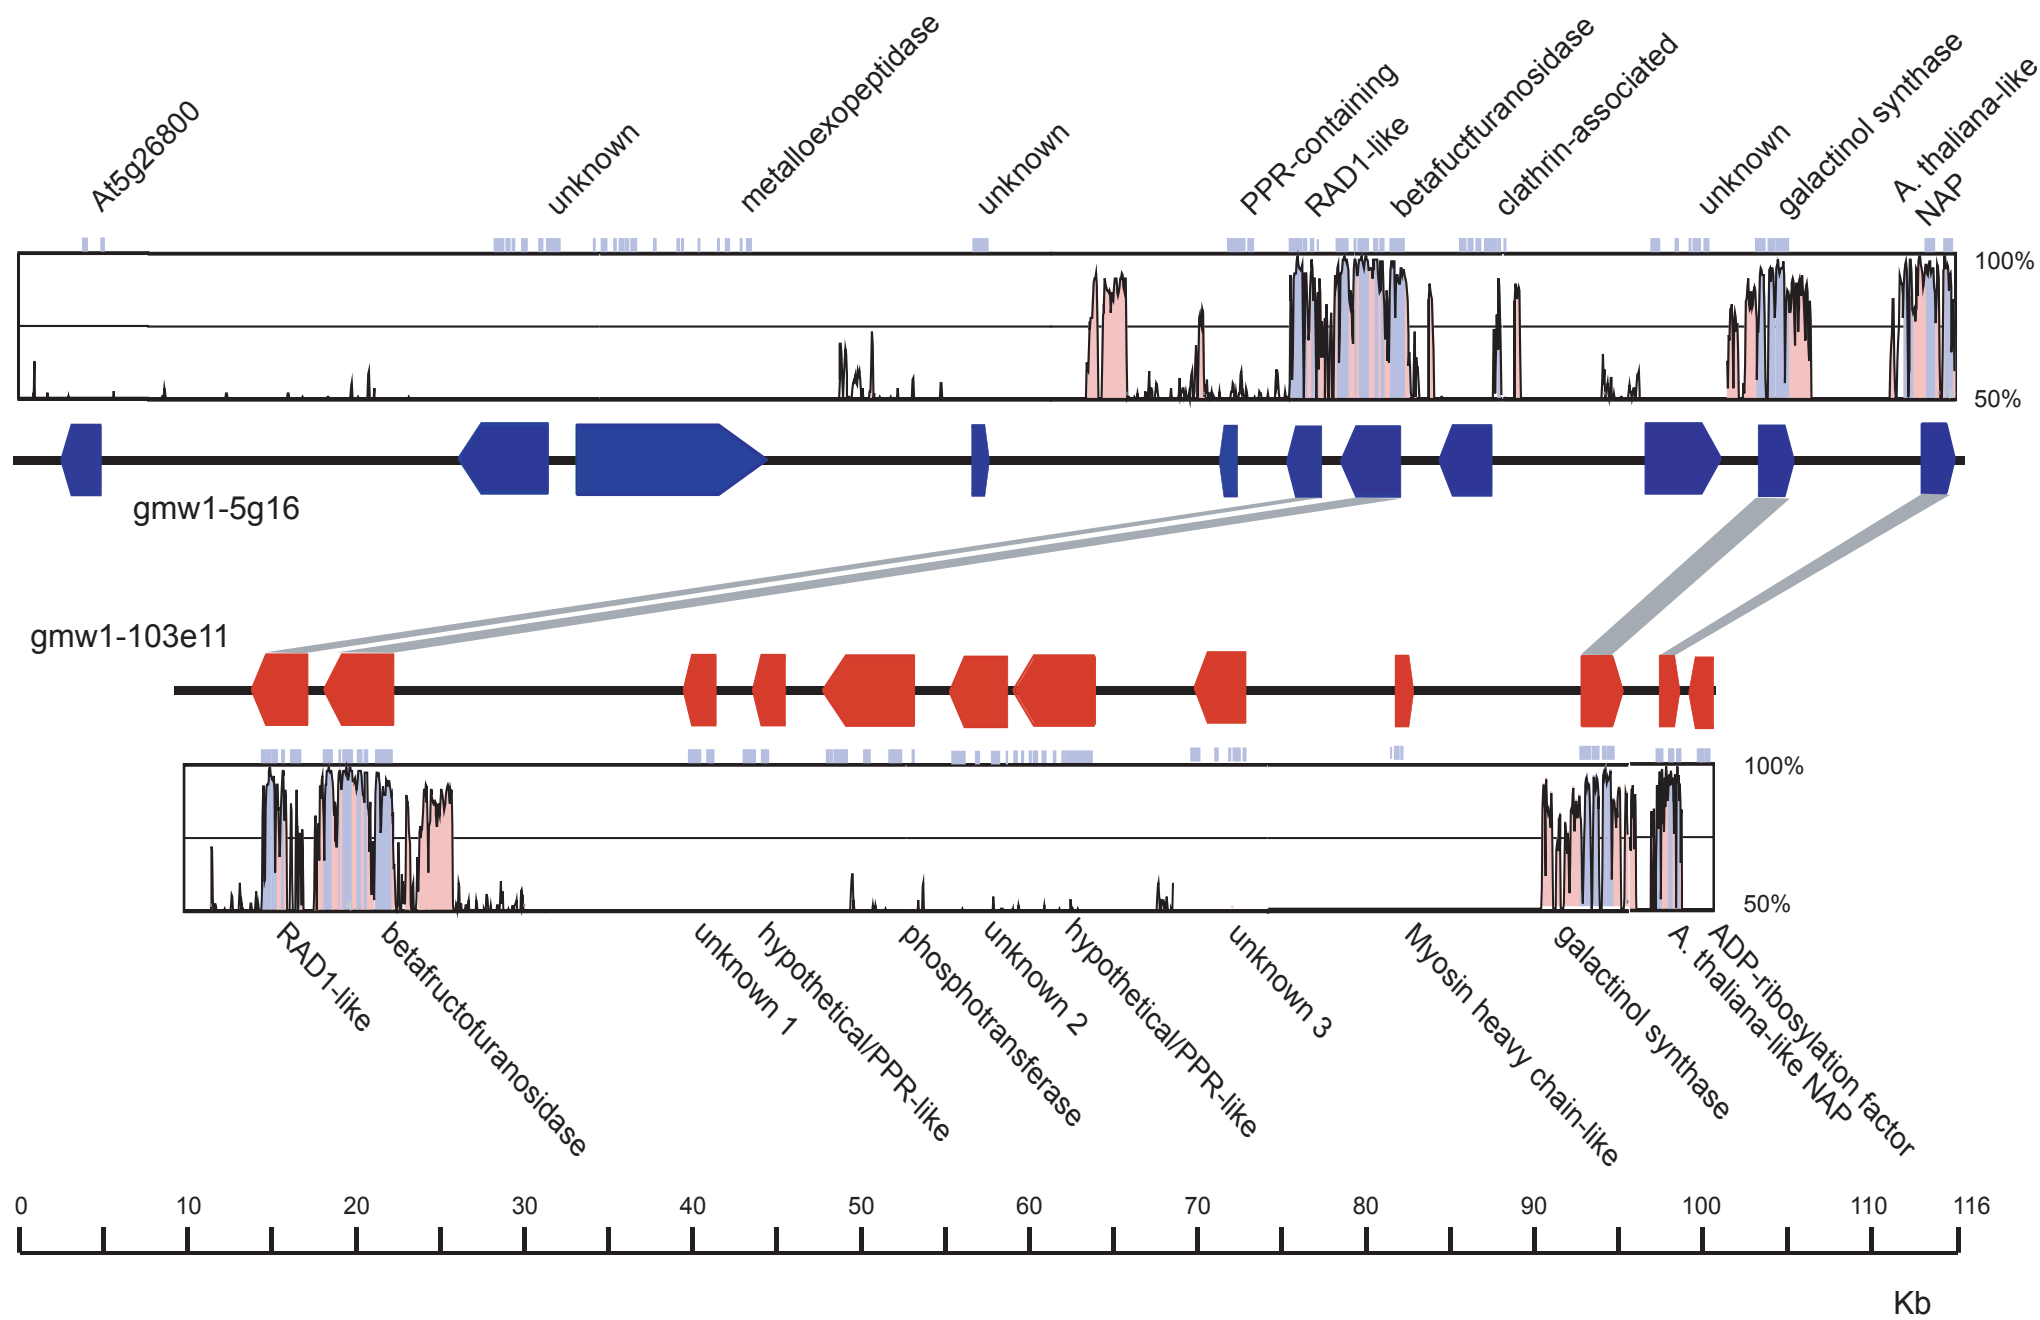

Supplement: 1471-2164-8-330-S3.pdf [file 1471-2164-8-330-S3.pdf]
