# Supplementary material for: Gene duplication and paleopolyploidy in soybean and the implications for whole genome sequencing
Source: PubMed Central journal article supplement (PMC2077340; doi:10.1186/1471-2164-8-330), 2007-09-19
Supplement: 1471-2164-8-330-S7.pdf [file 1471-2164-8-330-S7.pdf]

Supplemental Table 2. SSR primer sequences

| Primer name <sup>a</sup> | Primer sequence (5'-3')            | Primer Length (bp) |
|--------------------------|------------------------------------|--------------------|
| gmw2-133d1 U             | AAG TAT GAT AAT TCT ACT AT         | 20                 |
| gmw2-133d1 L             | GTT CAG ATA TGG AGA AGA GA         | 20                 |
| gmw1-93l19 U             | CAT CCC TCC TAC CCA AAA CGC AA     | 23                 |
| gmw1-93l19 L             | CAC AAC GCA CAA AAA CAA ACA CCC    | 24                 |
| gmw1-103e11 U            | TGG CGC AAT ACA GGG GTT AGG A      | 22                 |
| gmw1-103e11 L            | CCA AAC AAC CCC TTC AAT GTT AGA CG | 26                 |
| gmw1-5g16 U              | AGT CCA AAG TCT CAT CCT C          | 19                 |
| gmw1-5g16 L              | CTG TCA CAC CAA TTC AAC CA         | 20                 |
| gmw1-58k3 U              | ATA AAT ATA TCT TAT TTA ATG T      | 22                 |
| gmw1-58k3 L              | GTT AGA CTA ATT AAC GAA GAG T      | 22                 |
| gmw1-57d24 U             | GAC CTT CTC TTC ATA CAT CA         | 20                 |
| gmw1-57d24 L             | GTG ACT ACA GGT TCG CCT TGA        | 21                 |
| gmw1-27d20 U             | TAG GAT AAC ACA CTG TAG GAG        | 21                 |
| gmw1-27d20 L             | CTA TAG CTG CTA TAG CTT TA         | 20                 |
| gmw1-13o17 U             | CGC CCA ATT GTA CGC TTA GGG AT     | 23                 |
| gmw1-13o17 L             | TGC ACC TCC ACT GTG ATT CCC        | 21                 |

<sup>a</sup> BAC that the SSR was identified from and primer pairs designed from.
